# Supplementary material
Source: PubMed Central journal article supplement (PMC11382907)
Supplement: PBI-20-903-s001.pdf [file PBI-20-903-s001.pdf]

**Table S1:** P-values of Turkey's HSD test to compare plant traits among GL-3 and transgenic plants exposed to control and long-term drought stress conditions.

|                                      | <b>Plant height</b>               | <b>Root hydraulic conductivity</b> | <b>Shoot hydraulic conductivity</b> | <b>Leaf area</b>          | <b>Thickness of leaf</b>    | <b>Water holding capacity</b> | <b><math>\delta^{13}\text{C}</math> ‰</b> |
|--------------------------------------|-----------------------------------|------------------------------------|-------------------------------------|---------------------------|-----------------------------|-------------------------------|-------------------------------------------|
| Treatment                            | <0.001                            | <0.001                             | <0.001                              | 0.023                     | <0.001                      | 0.001                         | <0.001                                    |
| Transgenic plants                    | <0.001                            | <0.001                             | <0.001                              | <0.001                    | <0.001                      | <0.001                        | <0.001                                    |
| Treatment $\times$ Transgenic plants | 0.045                             | 0.009                              | 0.020                               | 0.024                     | 0.041                       | 0.048                         | 0.027                                     |
|                                      | <b>Internode length of shoots</b> | <b>Dry weight of shoots</b>        | <b>Net photosynthesis rate</b>      | <b>Transpiration rate</b> | <b>Stomatal conductance</b> | <b>Dry weight of roots</b>    | <b>ABA content</b>                        |
| Treatment                            | <0.001                            | <0.001                             | <0.001                              | <0.001                    | <0.001                      | <0.001                        | <0.001                                    |
| Transgenic plants                    | <0.001                            | <0.001                             | <0.001                              | <0.001                    | <0.001                      | <0.001                        | <0.001                                    |
| Treatment $\times$ Transgenic plants | 0.026                             | <0.001                             | 0.045                               | 0.047                     | 0.044                       | 0.044                         | 0.041                                     |
